# Supplementary material
Source: publisher figshare collection journal article supplement (https://gsapubs.figshare.com/ndownloader/files/30834397)
Supplement: Supplementary file 1 [file 30834397]

## Sheet: Sheet1
Supplementary Table 1
Mineral association of samples from the Daocheng batholith.
Sample no.	Lithology	Mineralogy	Accessory mineralogy	Age of crystallization (Ma)
18DC43/18DC48/18DC49	MME I	Pl (40-50) + Hb (25–35) + Bt (15–25) + Cpx (3-5) + Qtz (<2)	Mt + Ap + Zr ± Ttn	216
18DC44/18DC54/18DC64/18DC65/18DC66	MME II	Pl (50–55) + Hb (15–25) + Bt (10–20) + Qtz (5–10) ± Kfs (<3) ± Cpx (<3)	Mt + Ttn + Ap + Zr	215
18DC35/18DC45/18DC46	Quartz diorite	Pl (55–65) + Hb (10–15) + Bt (10–15) + Qtz (10-15) + Kfs (3-5) ± Cpx (<3)	Mt + Ttn + Ap + Zr	215
18DC42/18DC47/18DC50/18DC51	Granodiorite	Pl (40–55) + Qtz (15-20) + Kfs (10-20) + Bt (10–15) + Hb (5–10)	Mt + Ttn + Ap + Zr	218
18DC29/18DC41/18DC52/18DC53/18DC63/18DC67/18DC68/18DC69	Monzogranite	Kfs (30-40) + Pl (20–30) + Qtz (25-30) + Bt (5–10) + Hb (2-5)	Mt + Ttn + Ap + Zr	216
